# Supplementary figures and images for: The Dry and the Wet Case: Tree Growth Response in Climatologically Contrasting Years on the Island of Corsica
Source: MDPI journal article supplement (doi:10.3390/f12091175), 2021-08-30

— EH (1600m asl) — EM (1000m asl) — WM (790m asl) — WL (15m asl) — EL (10m asl)

2017

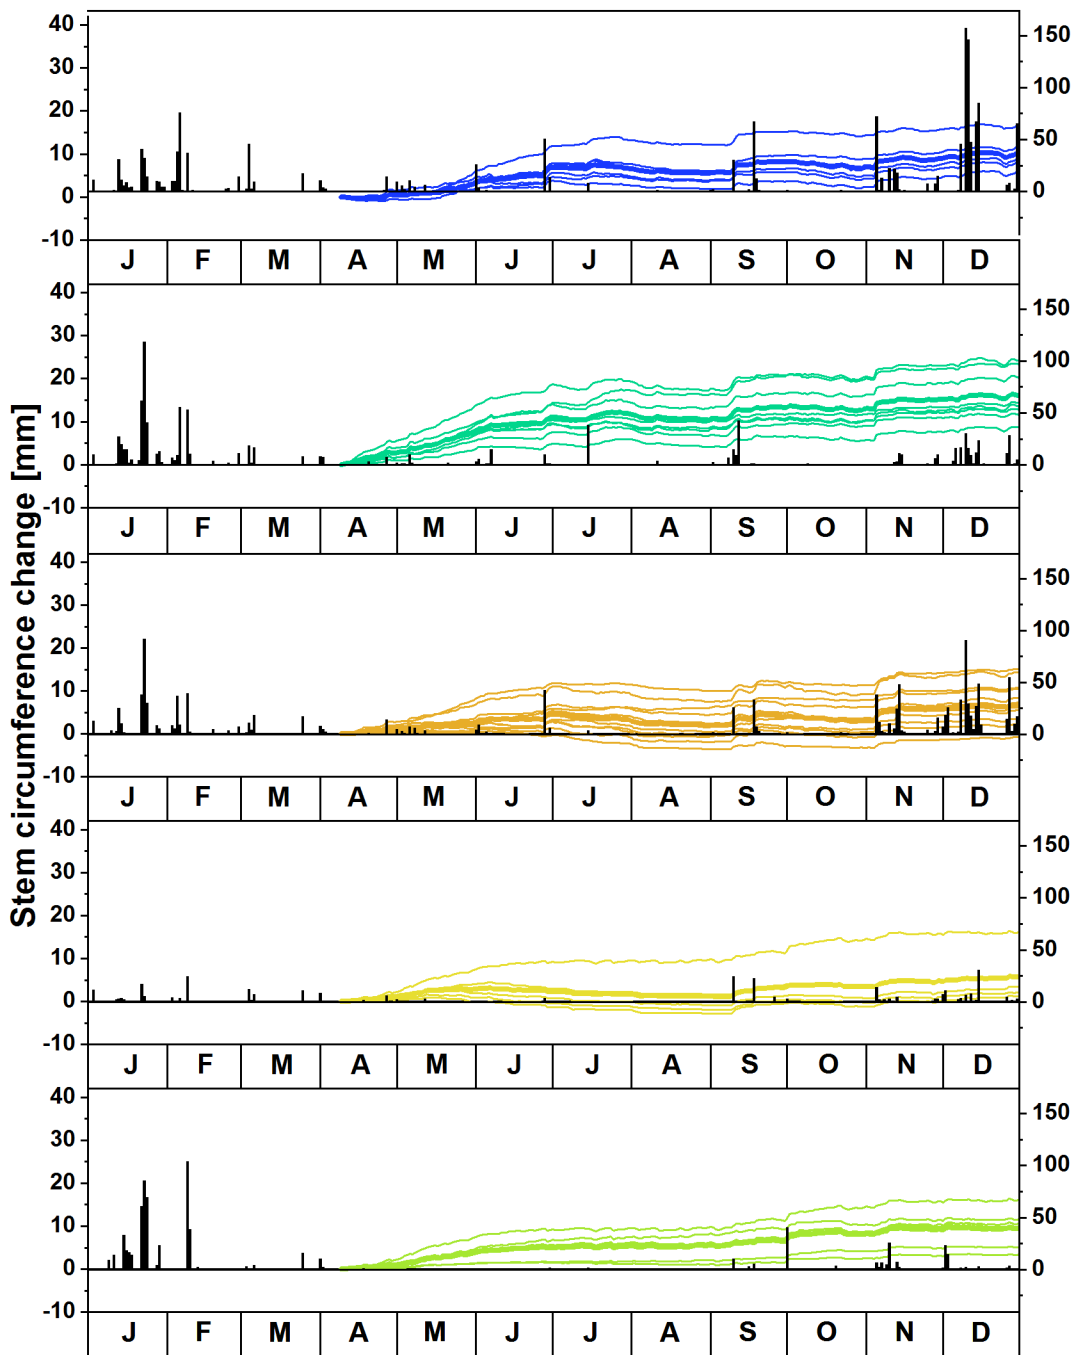

2018

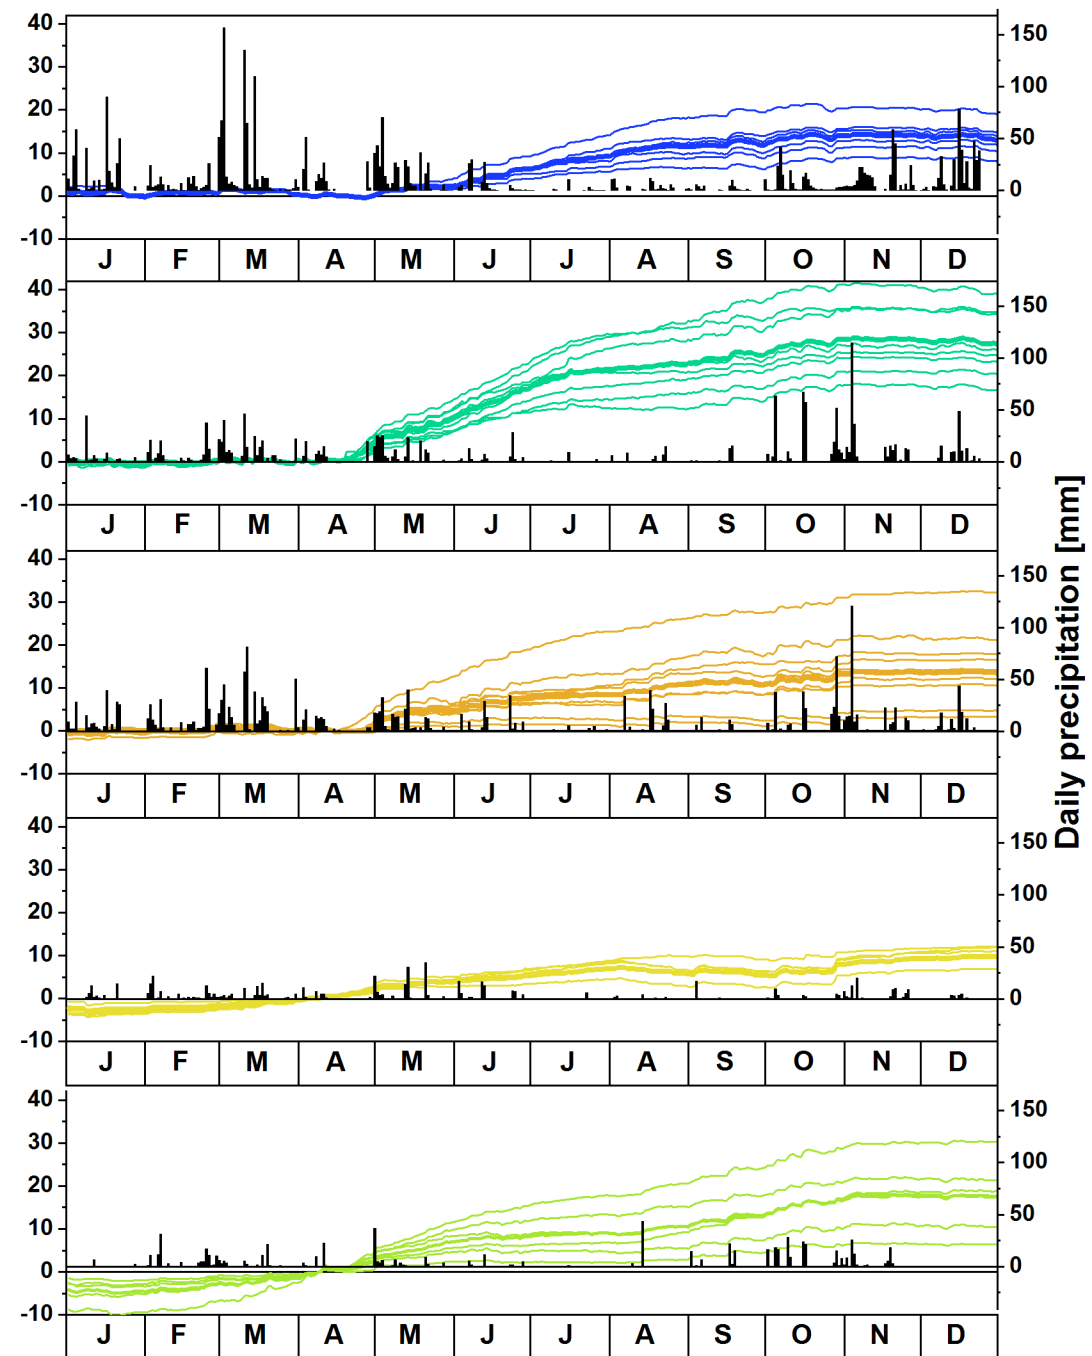

Supplement: s1 [file s1]

EH (1600m asl) EM (1000m asl) WM (790m asl) WL (15m asl) EL (10m asl)

2017

2018

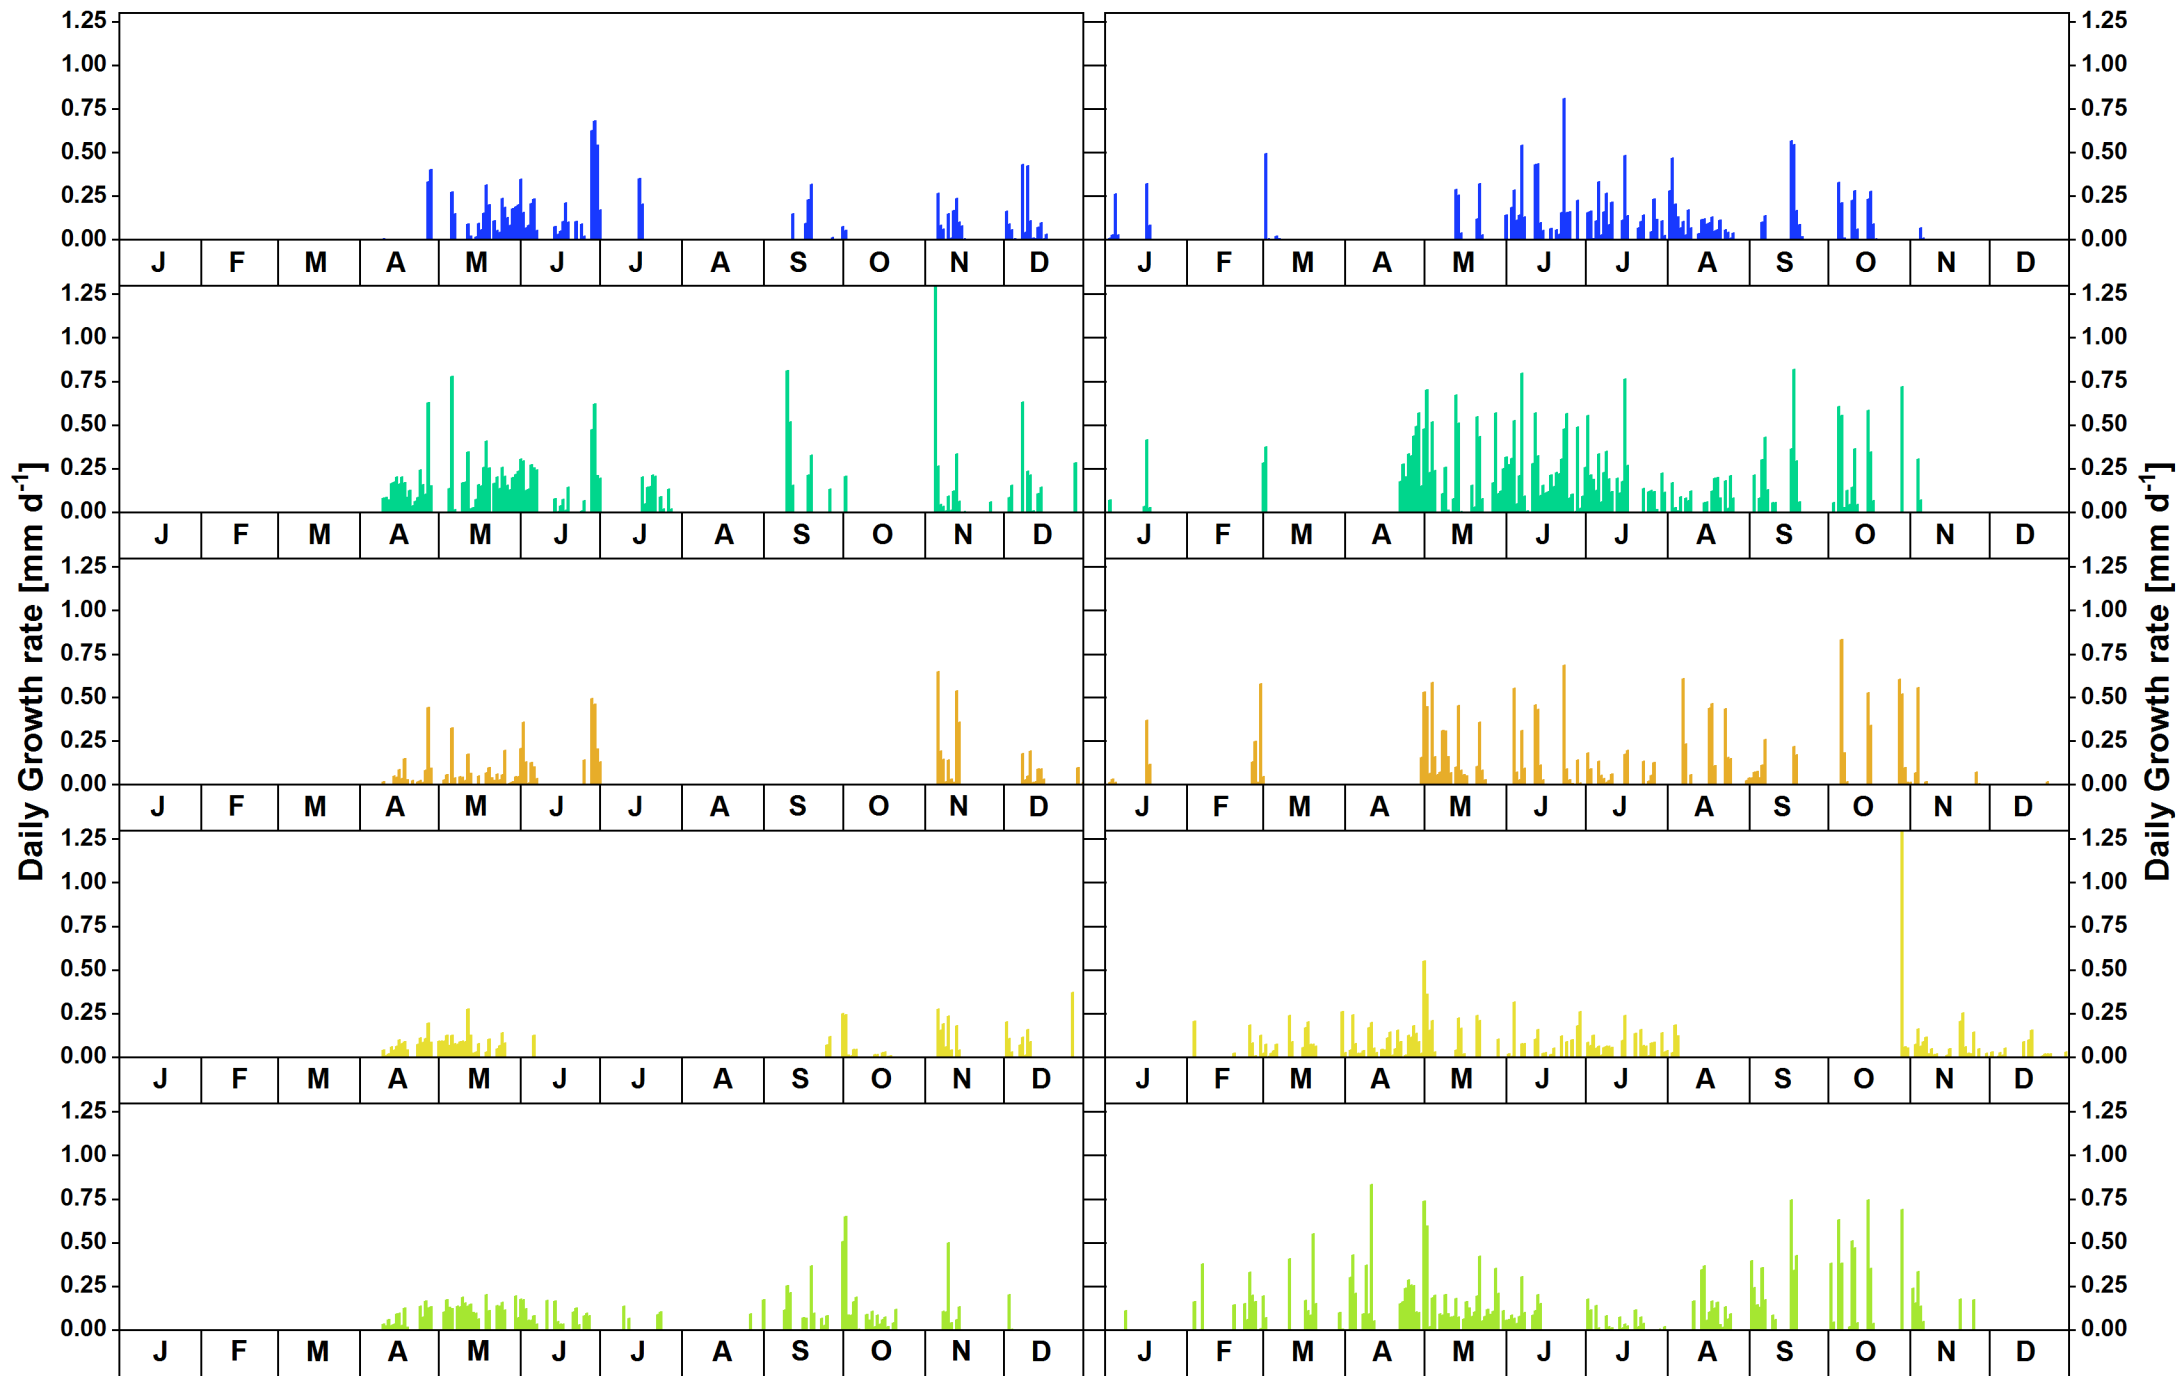

Supplement: s1 [file s1]

# 2017

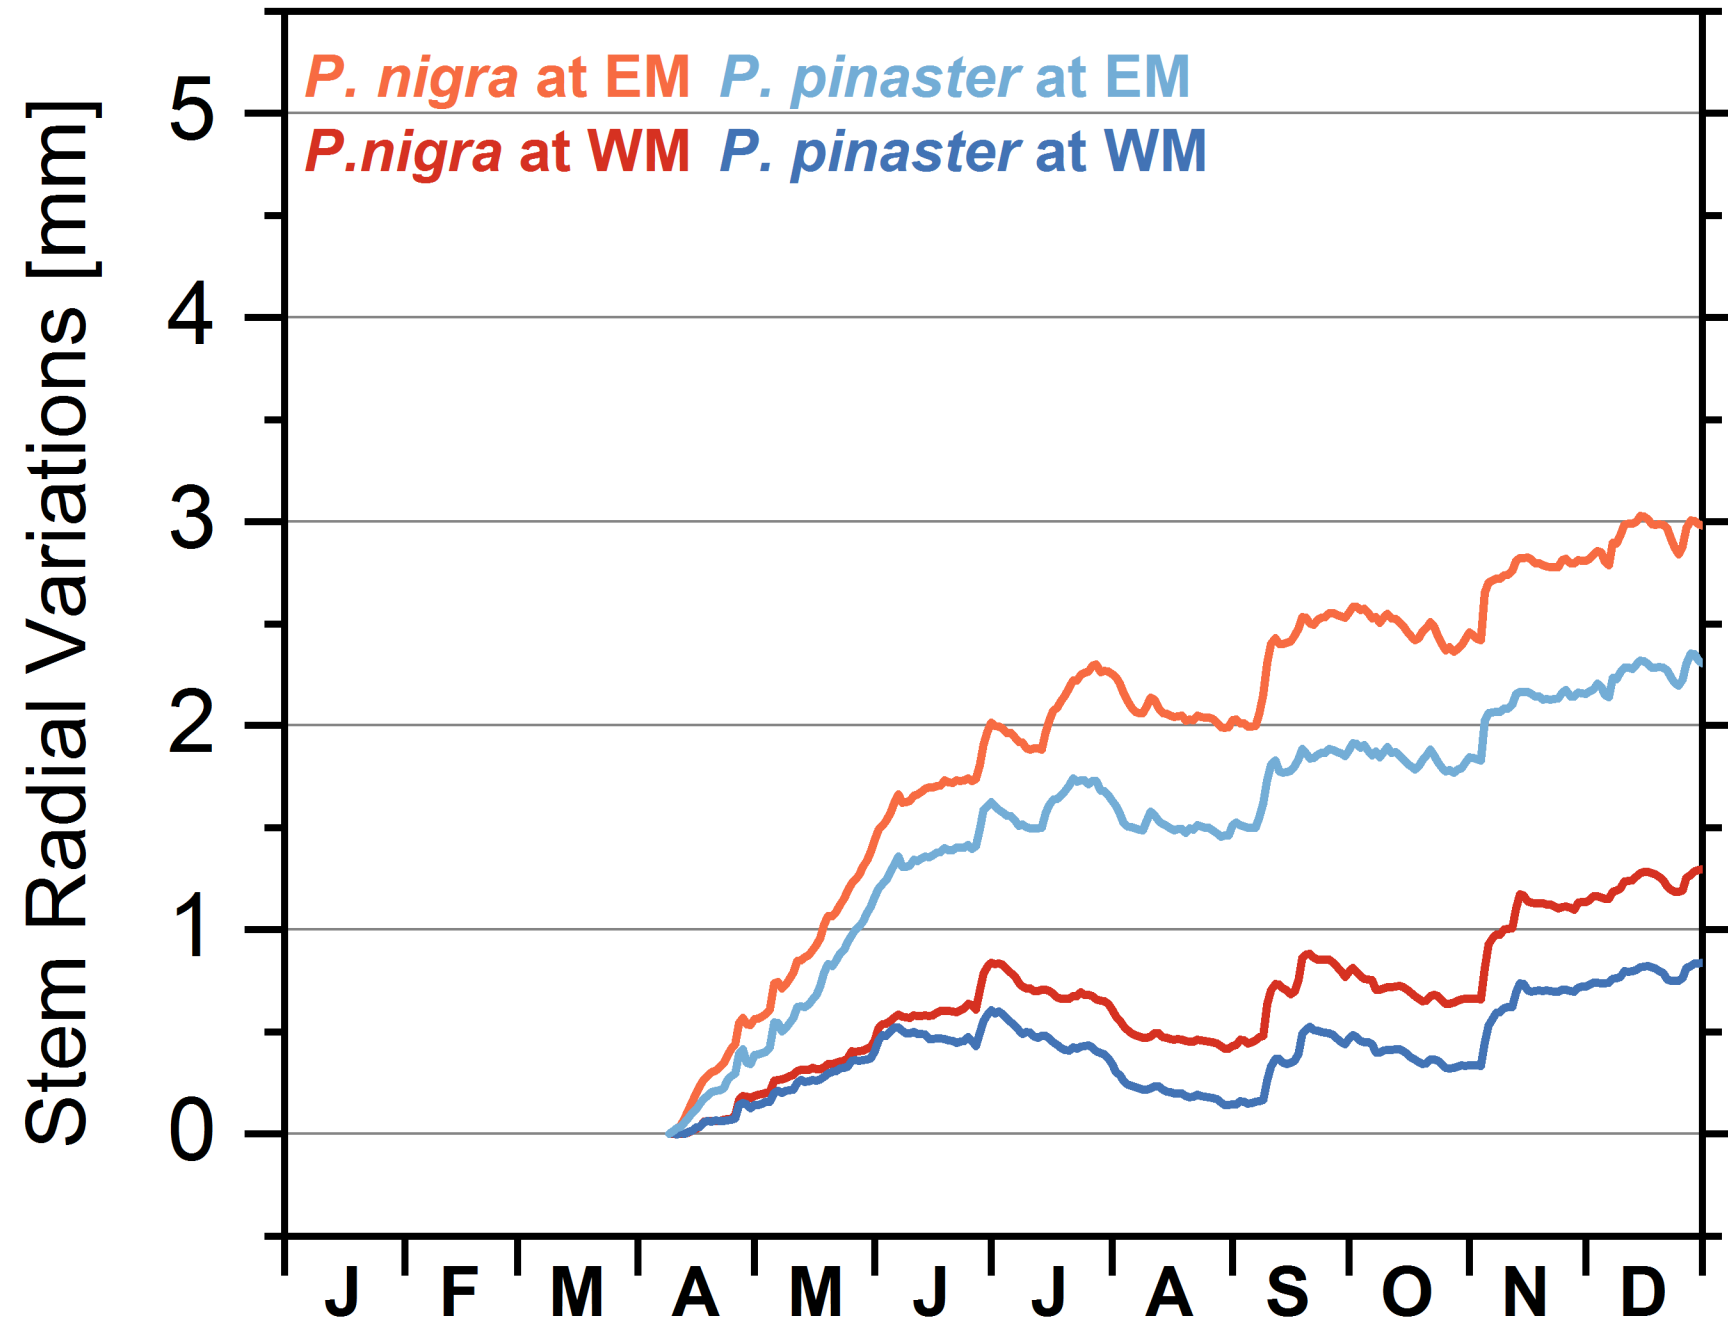

# 2018

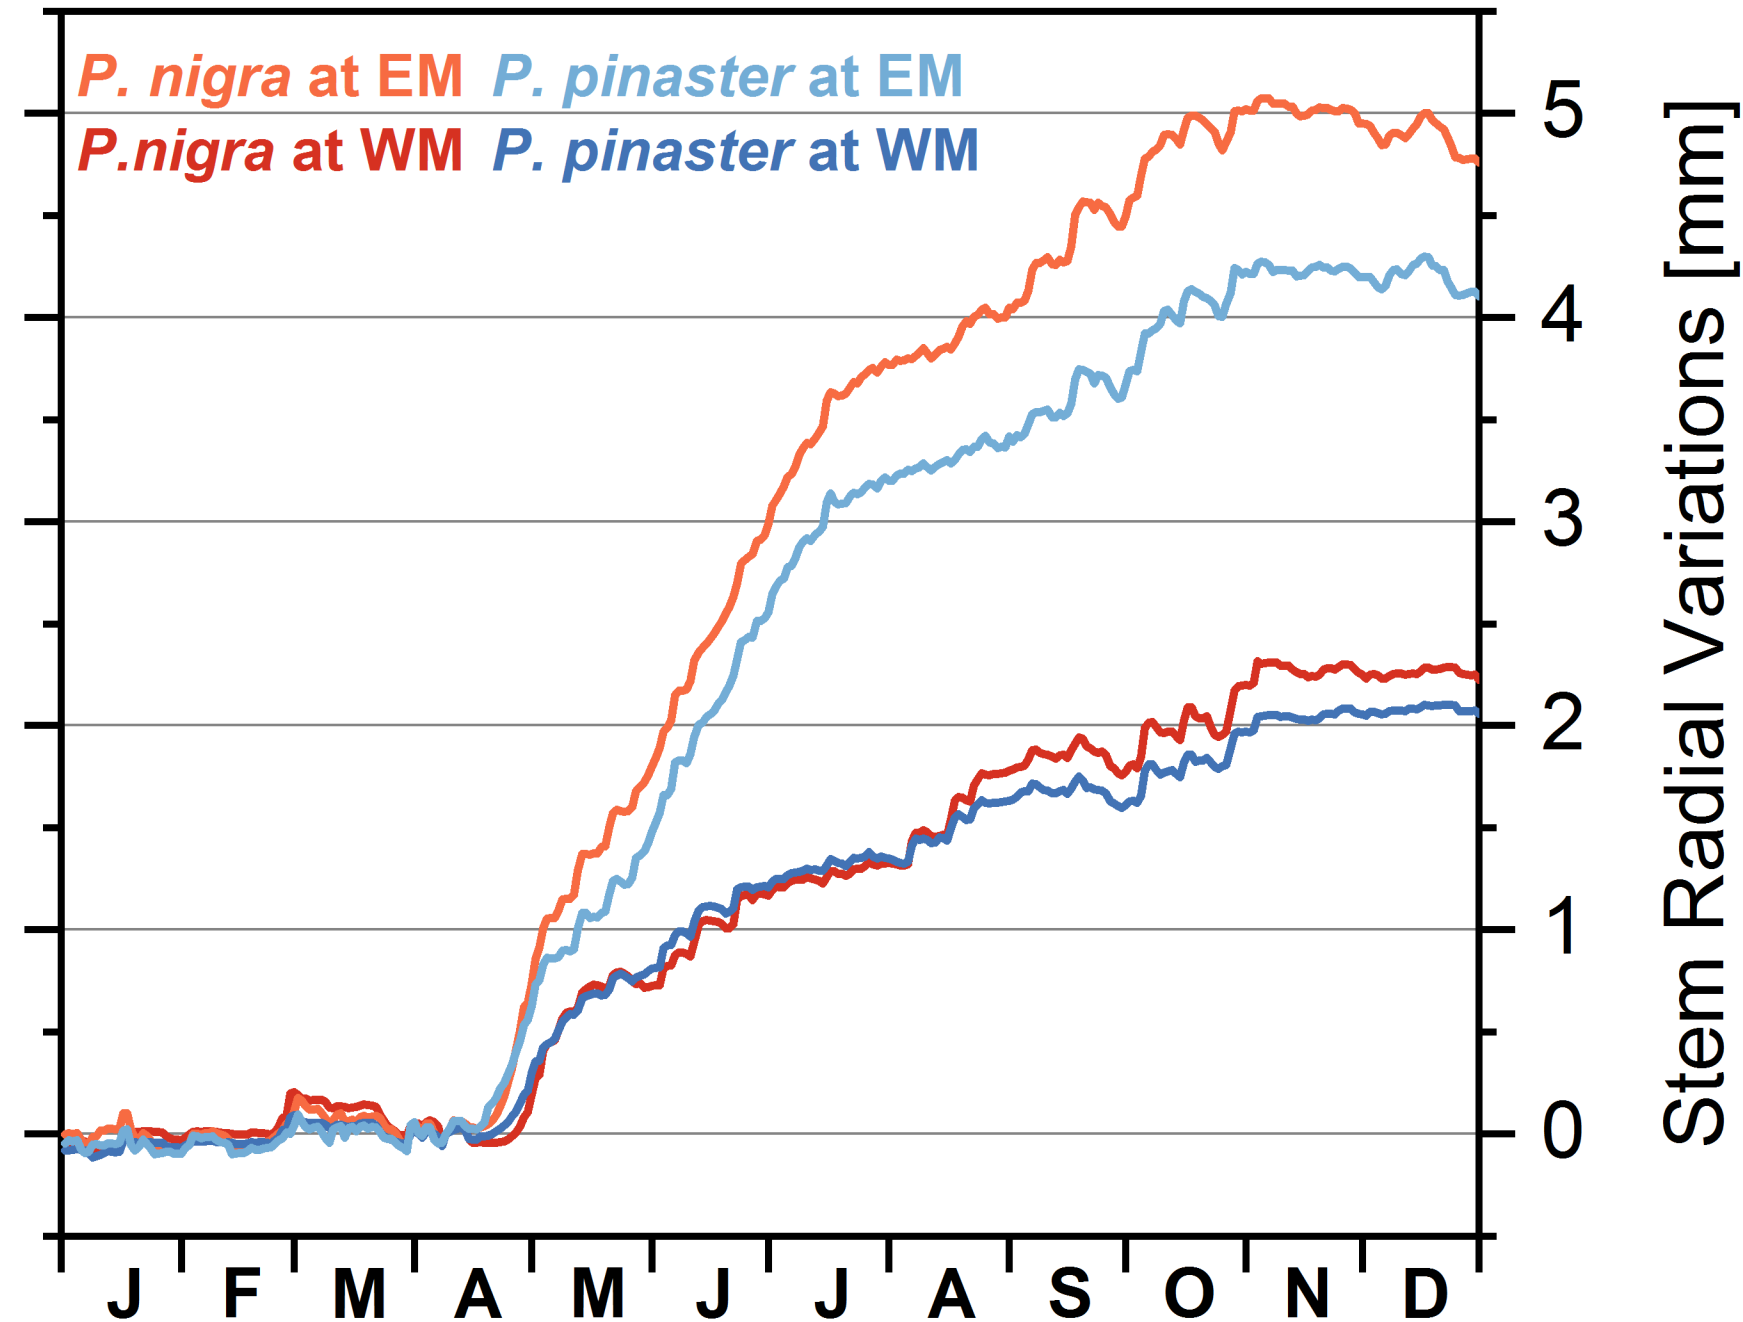

Supplement: s1 [file s1]
